# Supplementary material
Source: Research Square preprint supplement (doi:10.21203/rs.3.rs-9012757/v1)
Supplement: Supplementary file 1 [file 4d3526018fea3cde18c7596e.docx]

# **Suplementary Table**

**Supplementary Table All predicted epitopes for the YkuE protein obtained using different computational tools (ABCPred, BCPred, ElliPro, and IEDB), along with their respective antigenicity scores (VaxiJen) and allergenicity (AllerTop)**

| **Epitopes** | **Antigenicity** | **Alergenicity** |
| --- | --- | --- |
| **ABCpred** | | |
| YEEIAGPPNPDADLSI | 0.1130 (NON-ANTIGEN) | Allergen |
| AVGGVDDPHHDLDDYE | 0.1947 (NON-ANTIGEN) | Allergen |
| WVAQLDRLSPDLVINT | 0.9513 (ANTIGEN) | Non-Allergen |
| EHGWRDANQARHEFQI | 0.8134 (ANTIGEN) | Allergen |
| GPLLRRPGLFVFGTND | -0.2710 (NON-ANTIGEN) | Allergen |
| **BCpred** | | |
| VINTGDNLSDPKGVPGVLRA | -0.0884 (NON-ANTIGEN) | Allergen |
| PHHDLDDYEEIAGPPNPDAD | -0.1302 (NON-ANTIGEN) | Allergen |
| GKKRKPSEVPLPWKGMRAAF | 0.3608 (NON-ANTIGEN) | Non-Allergen |
| MVVKPTRRYAIRVASLTKTL | 0.2627 (NON-ANTIGEN) | Non-Allergen |
| **Ellipro** | | |
| MVVKPTRRYAIRVASLTKTLLTATGVLGLTGFS | 0.1156 (NON-ANTIGEN) | Non-Allergen |
| IVELPILEPGVLRNADEFR | 0.5818 (ANTIGEN). | Allergen |
| HDLDDYEEIAGPPNPDAD | -0.2707 (NON-ANTIGEN) | Allergen |
| LFGKKRKPSEVPLPWKGMRAAFIEHGW | -0.1555 (NON-ANTIGEN) | Non-Allergen |
| SDPKGVPGVLR | 0.3870 (NON-ANTIGEN) | Allergen |
| EPRVLERFERDGYM | -0.0661 (NON-ANTIGEN) | Non-Allergen |
| TPNQVKKQE | 1.0320 (ANTIGEN) | Allergen |
| NQARHEFQINHVR | 1.0099 (ANTIGEN) | Allergen |
| **MHC-I** | | |
| ADEFRILHL | 0.8111 (ANTIGEN) | Allergen |
| AGPPNPDADL | -0.0330 (NON-ANTIGEN) | Allergen |
| APEPRVLERF | 0.4109 (ANTIGEN) | Allergen |
| APSMVNPFL | 0.5986 (ANTIGEN) | Allergen |
| AQLDRLSPDL | 1.0770 (ANTIGEN) | Allergen |
| ARHEFQINH | 1.2678 (ANTIGEN) | Allergen |
| ASLTKTLL | -0.3151 (NON-ANTIGEN) | Allergen |
| DADLSIALL | 0.9672 (ANTIGEN) | Allergen |
| DANQARHEF | 1.1324 (ANTIGEN) | Allergen |
| DEFRILHL | 0.5570 (ANTIGEN) | Non-Allergen |
| DPKGVPGVL | 0.8653 (ANTIGEN) | Allergen |
| DRLSPDLVI | 1.6071 (ANTIGEN) | Allergen |
| EEIAGPPNP | -0.3587 (NON-ANTIGEN) | Allergen |
| ERDGYMLSL | 1.0733 (ANTIGEN) | Allergen |
| ERFERDGY | 0.2823 (NON-ANTIGEN). | Allergen |
| ERFERDGYM | 0.0353 (NON-ANTIGEN) | Non-Allergen |
| FAPSMVNPF | 0.4264 (ANTIGEN) | Non-Allergen |
| FAPSMVNPFL | 0.6948 (ANTIGEN) | Allergen |
| FELKIVEL | 1.9616 (ANTIGEN) | Non-Allergen |
| FERDGYMLSL | 0.4538 (ANTIGEN) | Allergen |
| FQINHVRI | 1.6454 (ANTIGEN) | Allergen |
| FQINHVRIA | 1.3882 (ANTIGEN) | Allergen |
| FVFGTNDYF | 0.0983 (NON-ANTIGEN) | Allergen |
| GPLLRRPGL | 0.0035 (NON-ANTIGEN) | Allergen |
| GPPNPDADL | (NON-ANTIGEN) | Allergen |
| GVDDPHHDL | -0.1997 (NON-ANTIGEN) | Allergen |
| GVPGVLRAL | -0.3276 (NON-ANTIGEN) | Non-Allergen |
| HAPEPRVL | 0.8547 (ANTIGEN) | Allergen |
| HEFQINHV | 1.0460 (ANTIGEN) | Allergen |
| HEFQINHVRI | 1.4975 (ANTIGEN) | Allergen |
| HTHGGQVCL | 1.8419 (ANTIGEN) | Allergen |
| KGMRAAFI | 0.5198 (ANTIGEN) | Non-Allergen |
| KGVPGVLRA | -0.0686 (NON-ANTIGEN) | Allergen |
| KGVPGVLRAL | -0.0821 (NON-ANTIGEN). | Allergen |
| KKQEWVAQL | 0.1372 (NON-ANTIGEN) | Allergen |
| KPSEVPLPW | 0.4363 (ANTIGEN) | Allergen |
| KQEWVAQL | 0.2305 (NON-ANTIGEN) | Allergen |
| KRKPSEVPL | 0.6679 (ANTIGEN) | Allergen |
| KTLLTATGV | -0.5551 (NON-ANTIGEN) | Allergen |
| LGLTGFSAL | 0.0856 (NON-ANTIGEN) | Allergen |
| LGPLLRRPGL | -0.2339 (NON-ANTIGEN) | Allergen |
| LHAPEPRVL | 0.9614 (ANTIGEN) | Allergen |
| LHTFGKMW | -0.7599 (NON-ANTIGEN) | Allergen |
| LPILEPGVL | 0.4820 (ANTIGEN) | Allergen |
| LPWKGMRAAF | 0.2154 (NON-ANTIGEN) | Non-Allergen |
| LRRPGLFVF | -0.4565 (NON-ANTIGEN) | Allergen |
| LTATGVLGL | 0.2040 (NON-ANTIGEN) | Allergen |
| LVINTGDNL | -0.4658 (NON-ANTIGEN) | Allergen |
| MLSLSGHTH | 0.8436 (ANTIGEN) | Non-Allergen |
| MRAAFIEHGW | 0.1288 (NON-ANTIGEN) | Non-Allergen |
| MVNPFLYL | 1.1987 (ANTIGEN). | Non-Allergen |
| MVNPFLYLF | 1.7193 (ANTIGEN) | Non-Allergen |
| MVVKPTRRY | -0.1231 (NON-ANTIGEN) | Non-Allergen |
| NADEFRILHL | 0.9830 (ANTIGEN). | Allergen |
| NPDADLSIAL | 0.9229 (ANTIGEN) | Allergen |
| NQARHEFQI | 1.1788 (ANTIGEN) | Allergen |
| NQVKKQEWV | 0.4687 (ANTIGEN) | Allergen |
| RAAFIEHGW | -0.2018 (NON-ANTIGEN) | Allergen |
| RKPSEVPLPW | 0.4302 (ANTIGEN) | Non-Allergen |
| RLFCRPSATL | 0.4503 (ANTIGEN) | Allergen |
| RNADEFRI | 1.6855 (ANTIGEN) | Allergen |
| RNADEFRIL | 0.8669 (ANTIGEN) | Allergen |
| RPSATLIRV | 0.5623 (ANTIGEN) | Allergen |
| RRPGLFVF | -0.4191 (NON-ANTIGEN). | Allergen |
| RRVQGLHTF | 0.1817 (NON-ANTIGEN) | Allergen |
| RRYAIRVASL | 0.7486 (ANTIGEN) | Non-Allergen |
| RVASLTKTL | -0.2759 (NON-ANTIGEN) | Allergen |
| SDPKGVPGVL | 0.7830 (ANTIGEN) | Allergen |
| SEVPLPWKGM | -0.2675 (NON-ANTIGEN) | Allergen |
| SGHTHGGQV | 2.6811 (ANTIGEN) | Allergen |
| SKFAPIRLF | 0.8525 (ANTIGEN) | Allergen |
| SMVNPFLYL | 0.7675 (ANTIGEN) | Non-Allergen |
| SNFELKIVEL | 1.5353 (ANTIGEN) | Non-Allergen |
| SNGLGTSKF | 1.4962 (ANTIGEN) | Allergen |
| TNDYFAPSM | 0.4845 (ANTIGEN) | Allergen |
| TRRVQGLHTF | 0.2652 (NON-ANTIGEN) | Allergen |
| TSKFAPIRL | 0.9192 (ANTIGEN) | Allergen |
| VASLTKTL | -0.5130 (NON-ANTIGEN) | Allergen |
| VASLTKTLL | -0.6515 (NON-ANTIGEN) | Allergen |
| VDDPHHDL | -0.3596 (NON-ANTIGEN) | Allergen |
| VKPTRRYAI | 0.3089 (NON-ANTIGEN) | Allergen |
| VLRALGPLL | -0.5581 (NON-ANTIGEN) | Non-Allergen |
| VPGVLRAL | -0.5043 (NON-ANTIGEN) | Non-Allergen |
| VPLPWKGM | 0.2541 (NON-ANTIGEN) | Non-Allergen |
| YAIRVASL | 1.0764 (ANTIGEN) | Non-Allergen |
| YEEIAGPPNP | -0.4084 (NON-ANTIGEN) | Allergen |
| YFAPSMVNPF | 0.4035 (ANTIGEN). | Allergen |
| **MHC-II** | | |
| RHEFQINHVRIAVGG | 1.0898 (ANTIGEN) | Allergen |
| ARHEFQINHVRIAVGG | 1.0532 (ANTIGEN) | Allergen |
| QARHEFQINHVRIAVGG | 1.1043 (ANTIGEN) | Allergen |
| RHEFQINHVRIAVG | 1.0282 (ANTIGEN) | Allergen |
| RHEFQINHVRIAV | 1.0843 (ANTIGEN) | Allergen |
| ARHEFQINHVRIAVGGV | 0.9362 (ANTIGEN) | Allergen |
| RHEFQINHVRIAVGGV | 0.9624 (ANTIGEN) | Allergen |
| HEFQINHVRIAV | 1.0893 (ANTIGEN) | Allergen |
| NQARHEFQINHVRIAVGG | 1.0283 (ANTIGEN) | Allergen |
| QARHEFQINHVRIAVGGV | 0.9910 (ANTIGEN) | Allergen |
| ARHEFQINHVRIAVG | 0.9909 (ANTIGEN) | Allergen |
| ARHEFQINHVRIAVGGVD | 1.0710 (ANTIGEN) | Allergen |
| RHEFQINHVRIA | 1.2805 (ANTIGEN) | Allergen |
| HEFQINHVRIAVG | 1.0281 (ANTIGEN) | Allergen |
| NPFLYLFGKKRK | -0.2400 (NON-ANTIGEN) | Allergen |
| RHEFQINHVRIAVGGVD | 1.1039 (ANTIGEN) | Allergen |
| QARHEFQINHVRIAVG | 1.0481 (ANTIGEN) | Allergen |
| HEFQINHVRIAVGG | 1.0917 (ANTIGEN) | Allergen |
| ALLHAPEPRVLE | 0.5268 (ANTIGEN) | Allergen |
| ARHEFQINHVRIAV | 1.0394 (ANTIGEN) | Allergen |
| NPFLYLFGKKRKP | -0.2985 (NON-ANTIGEN) | Allergen |
| NQARHEFQINHVRIAVG | 0.9702 (ANTIGEN) | Allergen |
| GVLRALGPLLRR | -0.7532 (NON-ANTIGEN) | Non-Allergen |
| RHEFQINHVRIAVGGVDD | 1.0273 (ANTIGEN) | Allergen |
| IALLHAPEPRVLE | 0.6188 (ANTIGEN) | Allergen |
| VNPFLYLFGKKRKP | -0.0944 (NON-ANTIGEN) | Allergen |
| ALLHAPEPRVLER | 0.3205 (NON-ANTIGEN) | Allergen |
| VNPFLYLFGKKRK | -0.0193 (NON-ANTIGEN) | Allergen |
| VNPFLYLFGKKRKPS | 0.0912 (NON-ANTIGEN) | Allergen |
| PGVLRALGPLLRRP | -0.3812 (NON-ANTIGEN) | Allergen |
| IALLHAPEPRVLER | 0.4221 (ANTIGEN) | Allergen |
| QARHEFQINHVRIAV | 1.0974 (ANTIGEN) | Allergen |
| ANQARHEFQINHVRIAVG | 0.9632 (ANTIGEN) | Allergen |
| PGVLRALGPLLRR | -0.5781 (NON-ANTIGEN) | Allergen |
| IALLHAPEPRVL | 0.5749 (ANTIGEN) | Allergen |
| VPGVLRALGPLLRRPG | -0.4554 (NON-ANTIGEN) | Allergen |
| NPFLYLFGKKRKPS | -0.0738 (NON-ANTIGEN) | Allergen |
| MVNPFLYLFGKKRKPS | 0.1368 (NON-ANTIGEN) | Non-Allergen |
| HEFQINHVRIAVGGV | 0.9554 (ANTIGEN) | Allergen |
| PGVLRALGPLLRRPG | -0.4560 (NON-ANTIGEN) | Allergen |
| EFQINHVRIAVG | 1.1302 (ANTIGEN) | Allergen |
| ARHEFQINHVRIA | 1.2085 (ANTIGEN) | Non-Allergen |
| PFLYLFGKKRKP | -0.1397 (NON-ANTIGEN) | Allergen |
| SMVNPFLYLFGKKRKPS | 0.0416 (NON-ANTIGEN) | Non-Allergen |
| KGMRAAFIEHGWRD | -0.0020 (NON-ANTIGEN) | Non-Allergen |
| SIALLHAPEPRVLER | 0.3722 (NON-ANTIGEN) | Allergen |
| MVNPFLYLFGKKRKP | -0.0248 (NON-ANTIGEN) | Non-Allergen |
| VNPFLYLFGKKRKPSE | 0.1645 (NON-ANTIGEN) | Allergen |
| SIALLHAPEPRVLE | 0.5469 (ANTIGEN) | Allergen |
| NDYFAPSMVNPF | 0.1591 (NON-ANTIGEN) | Allergen |
| SMVNPFLYLFGKKRKPSE | 0.1032 (NON-ANTIGEN) | Non-Allergen |
| PSMVNPFLYLFGKKRKPS | 0.2003 (NON-ANTIGEN) | Non-Allergen |
| MVNPFLYLFGKKRKPSE | 0.1976 (NON-ANTIGEN) | Non-Allergen |
| KGMRAAFIEHGW | 0.1864 (NON-ANTIGEN) | Allergen |
| LSIALLHAPEPRVLER | 0.5992 (ANTIGEN) | Allergen |
| KGVPGVLRALGPLLRRPG | -0.2912 (NON-ANTIGEN) | Allergen |
| GVPGVLRALGPLLRRPG | -0.4038 (NON-ANTIGEN) | Allergen |
| KGMRAAFIEHGWR | 0.2316 (NON-ANTIGEN) | Non-Allergen |
